# Supplementary material for: β2-microglobulin gene duplication in cetartiodactyla remains intact only in pigs and possibly confers selective advantage to the species
Source: PubMed Central journal article supplement (PMC5558954; doi:10.1371/journal.pone.0182322), 2017-08-16

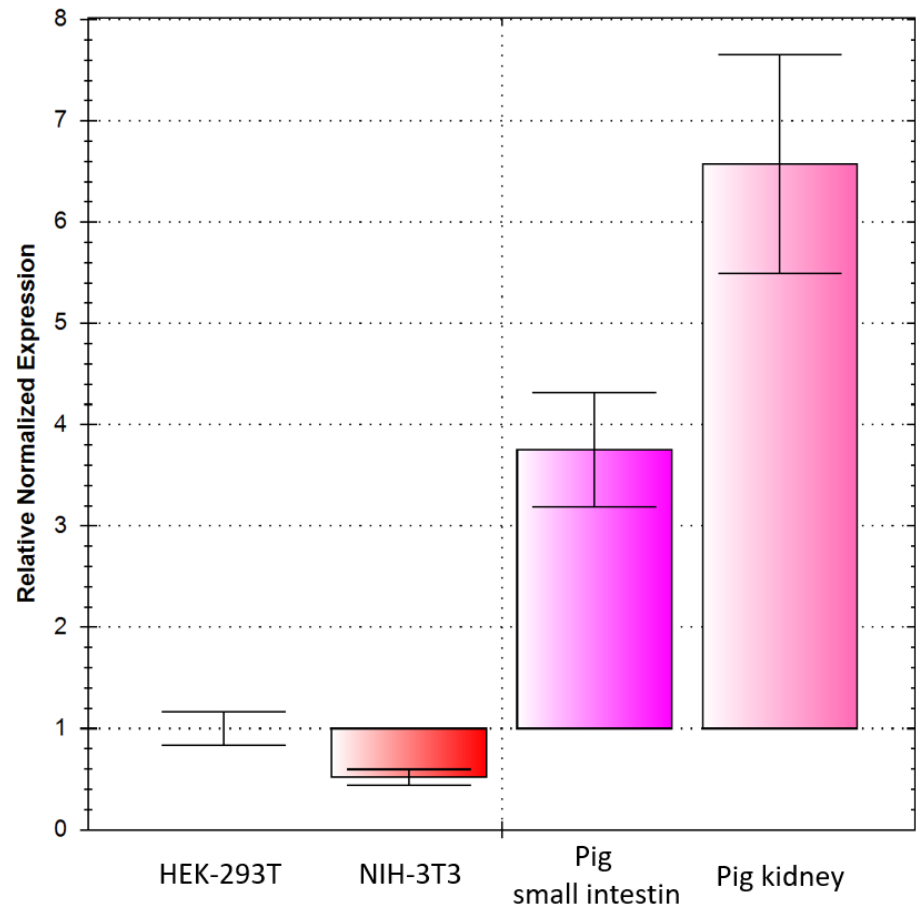

Supplement: pone.0182322.s007.pdf [file pone.0182322.s007.pdf]
