# Supplementary material for: β2-microglobulin gene duplication in cetartiodactyla remains intact only in pigs and possibly confers selective advantage to the species
Source: PubMed Central journal article supplement (PMC5558954; doi:10.1371/journal.pone.0182322), 2017-08-16

Non-transfected/Alexa 568

pEGFP-N1

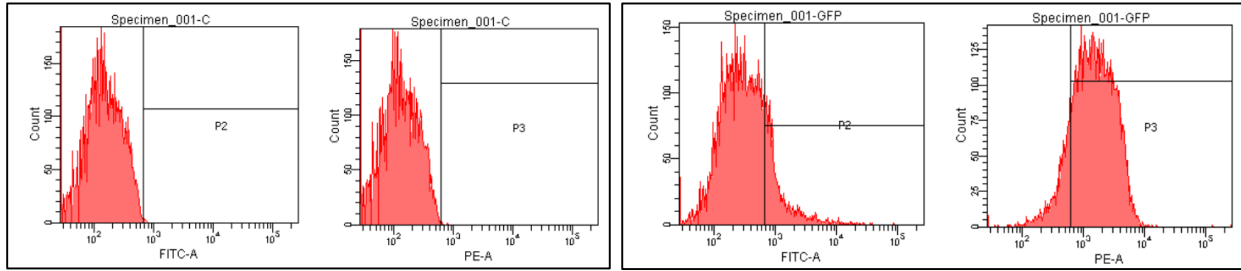

pCMV-HA/SLA class I staining/Alexa 568

Trial 1

Trial 2

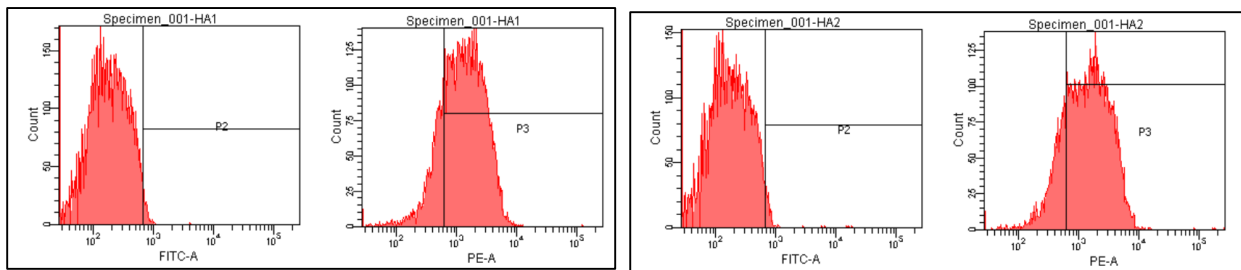

pCMV-HA-B2M/SLA class I staining/Alexa 568

Trial 1

Trial 2

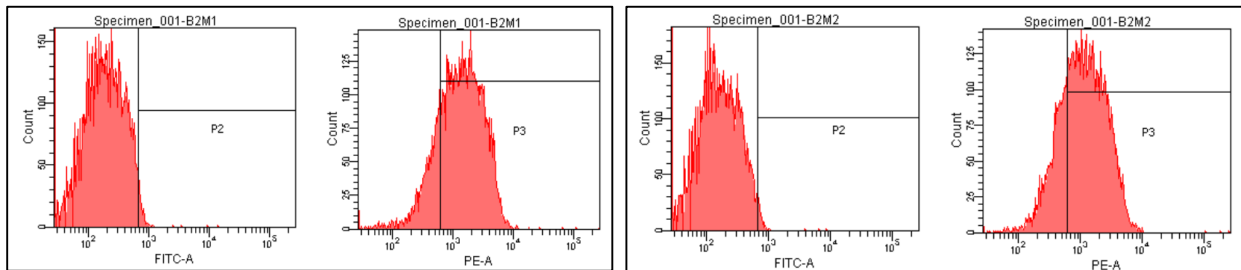

Supplement: pone.0182322.s009.pdf [file pone.0182322.s009.pdf]
